# Supplementary material
Source: PubMed Central journal article supplement (PMC6114131)
Supplement: NIHMS973392-supplement-supplement_1.pdf [file NIHMS973392-supplement-supplement_1.pdf]

**Supplementary Table (online only).** Comorbidity scales for the Vascular Study Group of New England (VSGNE) and Society for Vascular Surgery/American Association for Vascular Surgery (SVS/AAVS) grading scale

| Variable                      | VQI variable                                                                                                                                                                                           | SVS/AAVS grading scale |                                                                                                                                                                                                                                                                                                                         |
|-------------------------------|--------------------------------------------------------------------------------------------------------------------------------------------------------------------------------------------------------|------------------------|-------------------------------------------------------------------------------------------------------------------------------------------------------------------------------------------------------------------------------------------------------------------------------------------------------------------------|
| <b>Smoking</b>                |                                                                                                                                                                                                        |                        |                                                                                                                                                                                                                                                                                                                         |
| Never                         |                                                                                                                                                                                                        |                        |                                                                                                                                                                                                                                                                                                                         |
| Prior                         | Prior = quit $\geq$ 1 month ago                                                                                                                                                                        |                        |                                                                                                                                                                                                                                                                                                                         |
| Current                       | Current = still smoking within the last month, includes cigarettes, pipe, or cigar Exclude smokeless, ie, chewing tobacco, snuff, nicotine replacement therapy (eg, patch, gum, lozenge, e-cigarettes) |                        |                                                                                                                                                                                                                                                                                                                         |
| <b>Hypertension</b>           |                                                                                                                                                                                                        |                        |                                                                                                                                                                                                                                                                                                                         |
| No                            |                                                                                                                                                                                                        |                        |                                                                                                                                                                                                                                                                                                                         |
| Yes                           | Hypertension documented in history or recorded BP $\geq$ 140/90 preoperatively                                                                                                                         |                        |                                                                                                                                                                                                                                                                                                                         |
|                               |                                                                                                                                                                                                        | Hypertension           |                                                                                                                                                                                                                                                                                                                         |
|                               |                                                                                                                                                                                                        | 0                      | None (cutoff point, diastolic pressure usually lower than 90 mm Hg)                                                                                                                                                                                                                                                     |
|                               |                                                                                                                                                                                                        | 1                      | Controlled (cutoff point, diastolic pressure usually lower than 90 mm Hg) with single-drug controlled                                                                                                                                                                                                                   |
|                               |                                                                                                                                                                                                        | 2                      | Controlled with 2 drugs                                                                                                                                                                                                                                                                                                 |
|                               |                                                                                                                                                                                                        | 3                      | Requires >2 drugs or is uncontrolled                                                                                                                                                                                                                                                                                    |
| <b>Diabetes</b>               |                                                                                                                                                                                                        |                        |                                                                                                                                                                                                                                                                                                                         |
| None                          | Select most severe category (they are listed in hierarchical order)<br>None = patient has never been diagnosed with diabetes                                                                           |                        |                                                                                                                                                                                                                                                                                                                         |
| Diet controlled               | Diet = diagnosis of diabetes but not on any medication, including patients refusing medication                                                                                                         |                        |                                                                                                                                                                                                                                                                                                                         |
| Noninsulin medication only    | Noninsulin medications = oral medications and noninsulin injections                                                                                                                                    |                        |                                                                                                                                                                                                                                                                                                                         |
| Insulin                       | Insulin = injectable insulin                                                                                                                                                                           |                        |                                                                                                                                                                                                                                                                                                                         |
| <b>CAD symptoms</b>           |                                                                                                                                                                                                        | <b>Cardiac status</b>  | <b>Description of score</b>                                                                                                                                                                                                                                                                                             |
| None                          | MI <6 months ago = recent MI within last 6 months; unstable angina = new onset, increasing frequency, lasting >20 minutes, or rest angina                                                              | 0                      | Asymptomatic                                                                                                                                                                                                                                                                                                            |
| Prior MI, no current symptoms | History of MI, no symptoms = old MI >6 months ago                                                                                                                                                      | 1                      | Asymptomatic but with remote MI by history (6 months), occult MI by electrocardiography, or fixed defect on dipyridamole thallium or similar scan                                                                                                                                                                       |
| Stable angina                 | Stable angina = stable pattern or symptoms with or without antianginal medication                                                                                                                      | 2                      | Any one of the following: stable angina, no angina but significant reversible perfusion defect on dipyridamole thallium scan, significant silent ischemia (1% of time) on Holter monitoring, ejection fraction 25% to 45%, controlled ectopy or asymptomatic arrhythmia, or history of CHF that is now well compensated |

(Continued on next page)

**Supplementary Table (online only).** Continued.

| Variable                              | VQI variable                                                                                                                                                                      |                  | SVS/AAVS grading scale                                                                                                                                                                                                    |
|---------------------------------------|-----------------------------------------------------------------------------------------------------------------------------------------------------------------------------------|------------------|---------------------------------------------------------------------------------------------------------------------------------------------------------------------------------------------------------------------------|
| Unstable angina or MI within 6 months | MI <6 months ago = recent MI within last 6 months; unstable angina = new onset, increasing frequency, lasting >20 minutes, or rest angina                                         | 3                | Any one of the following: unstable angina, symptomatic or poorly controlled ectopy/arrhythmia (chronic/recurrent), poorly compensated or recurrent CHF, ejection fraction <25%, MI within 6 months                        |
| Prior CABG                            |                                                                                                                                                                                   |                  |                                                                                                                                                                                                                           |
| None                                  | CABG                                                                                                                                                                              |                  |                                                                                                                                                                                                                           |
| Within 5 years                        |                                                                                                                                                                                   |                  |                                                                                                                                                                                                                           |
| Longer than 5 years                   |                                                                                                                                                                                   |                  |                                                                                                                                                                                                                           |
| Prior PCI                             |                                                                                                                                                                                   |                  |                                                                                                                                                                                                                           |
| None                                  | PCI angioplasty, atherectomy, stent                                                                                                                                               |                  |                                                                                                                                                                                                                           |
| Within 5 years                        |                                                                                                                                                                                   |                  |                                                                                                                                                                                                                           |
| Longer than 5 years                   |                                                                                                                                                                                   |                  |                                                                                                                                                                                                                           |
| Prior CHF                             |                                                                                                                                                                                   |                  |                                                                                                                                                                                                                           |
| None                                  | CHF                                                                                                                                                                               |                  |                                                                                                                                                                                                                           |
| Asymptomatic                          | Asymptomatic, with history of CHF: no limitation of physical activity. Ordinary physical activity does not cause undue fatigue, palpitation, or dyspnea (shortness of breath).    |                  |                                                                                                                                                                                                                           |
| Mild                                  | Mild: Slight limitation of physical activity. Comfortable at rest, but ordinary physical activity results in fatigue, palpitation, or dyspnea.                                    |                  |                                                                                                                                                                                                                           |
| Moderate                              | Moderate: Marked limitation of physical activity. Comfortable at rest, but less than ordinary activity causes fatigue, palpitation, or dyspnea.                                   |                  |                                                                                                                                                                                                                           |
| Severe                                | Severe: Unable to carry out any physical activity without discomfort. Symptoms of cardiac insufficiency at rest. If any physical activity is undertaken, discomfort is increased. |                  |                                                                                                                                                                                                                           |
| COPD                                  |                                                                                                                                                                                   | Pulmonary status |                                                                                                                                                                                                                           |
| None                                  | COPD is defined by any disease that results in COPD (ie, asthma, chronic bronchitis, emphysema, asbestos, occupational exposure to dust/chemicals)                                | 0                | Asymptomatic, normal chest radiograph, pulmonary function tests within 20% of predicted                                                                                                                                   |
| Not treated                           | Not treated = COPD documented in record but not treated with medication                                                                                                           | 1                | Asymptomatic or mild dyspnea on exertion, mild chronic parenchymal radiograph changes, pulmonary function tests 65% to 80% of predicted                                                                                   |
| On medication                         | Medication includes theophylline, aminophylline, inhalers, or steroids                                                                                                            | 2                | Between 1 and 3                                                                                                                                                                                                           |
| On home oxygen                        | Any home oxygen use                                                                                                                                                               | 3                | Vital capacity <1.85 L, FEV <sub>1</sub> <1.2 L or <35% of predicted, maximal voluntary ventilation <50% of predicted, P <sub>CO2</sub> >45 mm Hg, supplemental oxygen use medically necessary, or pulmonary hypertension |

**Supplementary Table (online only).** Continued.

| Variable               | VQI variable                                                                                                                                | SVS/AAVS grading scale                                               |
|------------------------|---------------------------------------------------------------------------------------------------------------------------------------------|----------------------------------------------------------------------|
| Dialysis               |                                                                                                                                             |                                                                      |
| No                     |                                                                                                                                             |                                                                      |
| Functioning transplant | Transplant = patient has functioning kidney transplant                                                                                      |                                                                      |
| On dialysis            | Dialysis = currently on hemodialysis or peritoneal dialysis                                                                                 |                                                                      |
|                        | Renal status                                                                                                                                |                                                                      |
|                        | 0                                                                                                                                           | No known renal disease, normal serum creatinine level                |
|                        | 1                                                                                                                                           | Moderately elevated creatinine level, as high as 2.4 mg/dL           |
|                        | 2                                                                                                                                           | Creatinine level, 2.5-5.9 mg/dL                                      |
|                        | 3                                                                                                                                           | Creatinine level >6.0 mg/dL or on dialysis or with kidney transplant |
| Stress test result     |                                                                                                                                             |                                                                      |
| Not done               | Includes stress ECG, stress echocardiography, nuclear stress scans within 2 years of surgery, assuming no intervening coronary intervention |                                                                      |
| Normal                 |                                                                                                                                             |                                                                      |
| Ischemic changes       |                                                                                                                                             |                                                                      |
| MI                     |                                                                                                                                             |                                                                      |
| Both ischemia and MI   |                                                                                                                                             |                                                                      |
|                        | Age                                                                                                                                         |                                                                      |
|                        | 0                                                                                                                                           | <55 years old                                                        |
|                        | 1                                                                                                                                           | 55-69 years old                                                      |
|                        | 2                                                                                                                                           | 70-79 years old                                                      |
|                        | 3                                                                                                                                           | >80 years old                                                        |

*BP*, Blood pressure; *CABC*, coronary artery bypass graft surgery; *CAD*, coronary artery disease; *CHF*, congestive heart failure; *COPD*, chronic obstructive pulmonary disease; *ECC*, electrocardiography; *FEV<sub>1</sub>*, forced expiratory volume in the first second of expiration; *MI*, myocardial infarction; *Pco<sub>2</sub>*, partial pressure of carbon dioxide; *PCI*, percutaneous coronary intervention.
